# Supplementary material
Source: HighWire-hosted journal article supplement (https://www.jneurosci.org/highwire/filestream/602298/field_highwire_adjunct_files/0/Supplemental_Figures.pdf)
Supplement: Supplemental_Figures.pdf [file Supplemental_Figures.pdf]

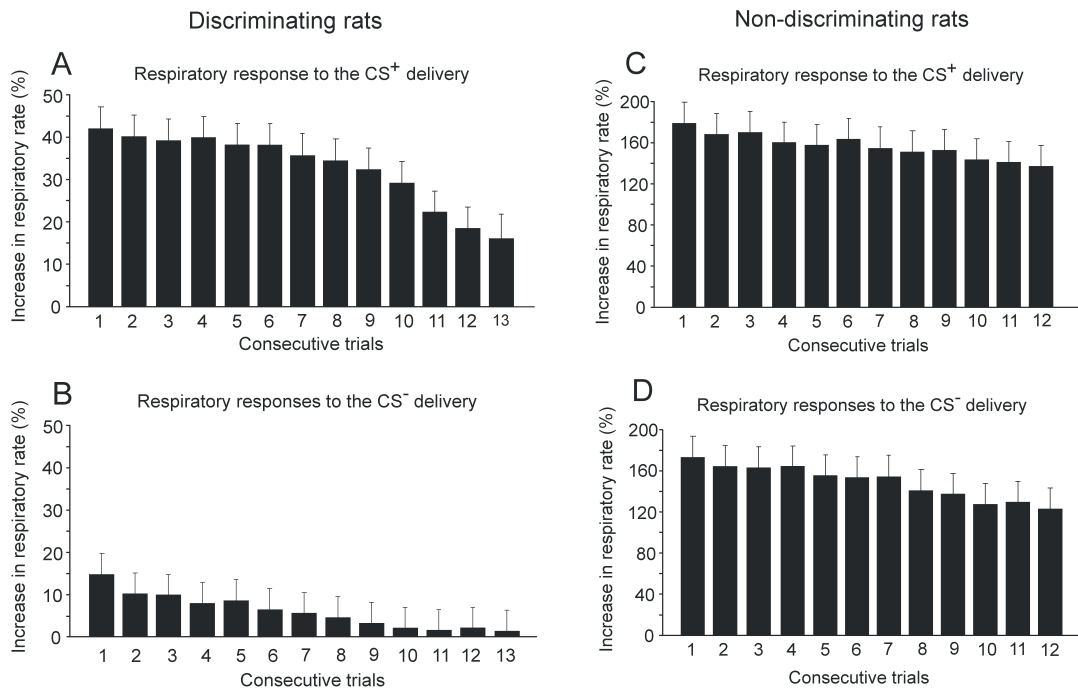

**Supplemental Figure S1. Respiratory responses to the CS<sup>+</sup> and CS<sup>-</sup> in rats discriminating and non-discriminating between these stimuli.** (A, B) Average alterations in respiratory responses to the CS<sup>+</sup> and CS<sup>-</sup> during 13 trials in 10 discriminating rats. (C, D) Average alterations in respiratory responses to the CS<sup>+</sup> and CS<sup>-</sup> during 12 trials in five non-discriminating rats.

In discriminating rats, the average respiratory responses to the CS<sup>+</sup> were not significantly different between the initial six trials (One-way ANOVA;  $F=0.6689$ ,  $p=0.6487$ ,  $df=5$ , 54). In the following 7-13 trials, the average respiratory responses significantly decreased (One-way ANOVA;  $F=9.72$ ,  $p<0.0001$ ,  $df=6$ , 63). In non-discriminating rats, the average respiratory responses to the CS<sup>+</sup> were not significantly different between 12 consecutive trials (One-way ANOVA;  $F=0.9771$ ,  $p=0.4784$ ,  $df=10$ , 39).

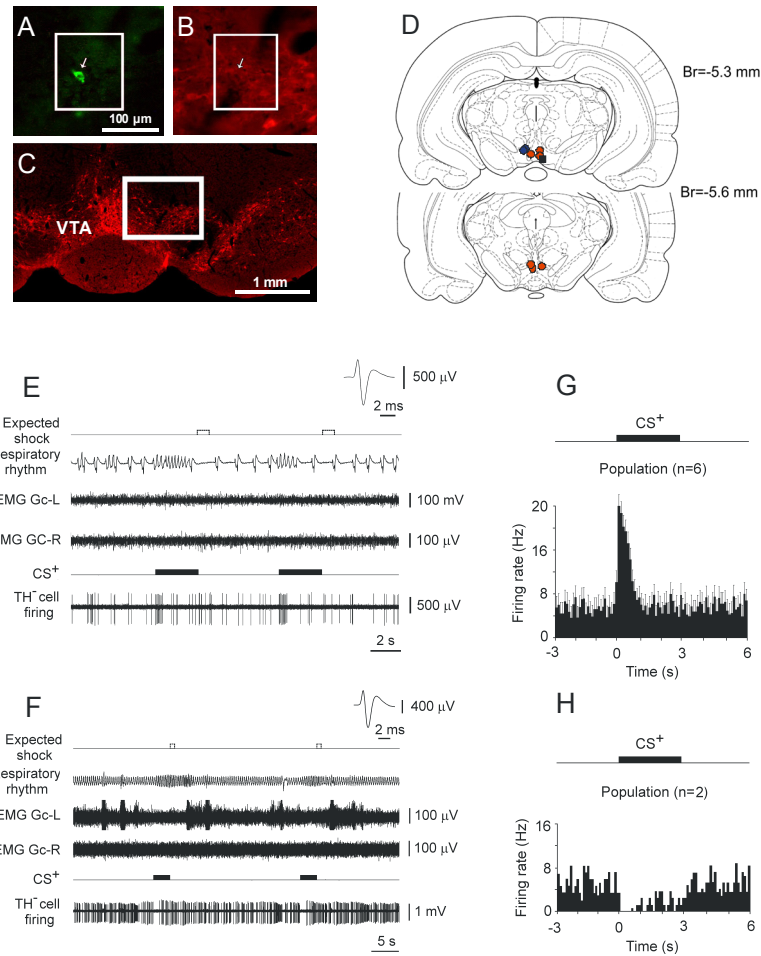

**Supplemental Figure S2. Excitatory and inhibitory responses of VTA TH-negative (TH<sup>-</sup>) neurons to the CS<sup>+</sup>.** (A) A VTA neuron filled with Nb. (B) This neurons does not express TH-immunoreactivity. (C) The location of this TH<sup>-</sup> neuron in the dorsal VTA. (D) Cumulative data showing the location of nine TH<sup>-</sup> neurons in the VTA. Six red dots denote neurons showing excitatory responses to the CS<sup>+</sup>. Two blue dots denote neurons inhibited by the CS<sup>+</sup>. The black square denotes one neuron that did not respond to the CS<sup>+</sup> delivery. (E) Phasic activation of a VTA TH<sup>-</sup> neuron to the CS<sup>+</sup>. (F) Inhibition of a VTA TH<sup>-</sup> neuron in response to the CS<sup>+</sup>. (G, H) Population PSTHs (100 ms bin) illustrating excitatory or inhibitory responses of TH<sup>-</sup> neurons to the CS<sup>+</sup>.

Six of the 9 TH<sup>-</sup> neurons were excited by the CS<sup>+</sup> with an average latency of  $53 \pm 10$  ms (min=20 ms, max=82 ms). The number of spikes in excitatory responses ranged from 2 to 11 spikes with a mean of  $7 \pm 2$  spikes. Two TH<sup>-</sup> neurons were inhibited by the CS<sup>+</sup> with average latencies of  $54 \pm 15$  ms (min=24 ms, max=80 ms) and  $252 \pm 49$  ms (min=168, max=337 ms). The average durations of inhibitory pauses were  $0.74 \pm 0.13$  s (min=0.49 s, max=1.01 s) and  $3.37 \pm 0.3$  s (min=2.84 s, max=3.9 s). One TH<sup>-</sup> neuron did not respond to the CS<sup>+</sup> delivery.

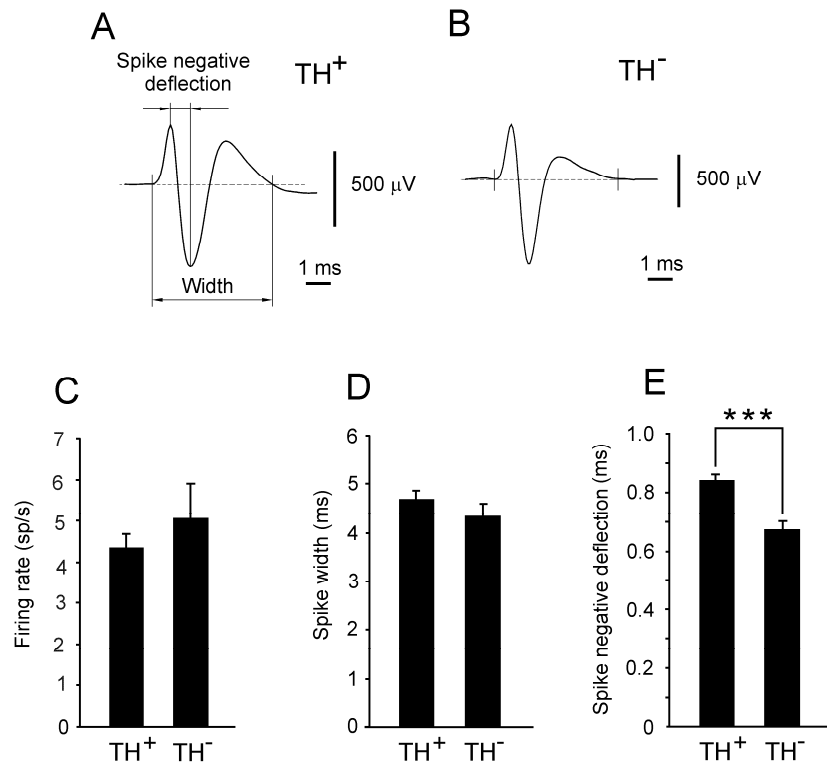

**Supplemental Figure S3. Comparison of electrophysiological characteristics of TH-positive (TH<sup>+</sup>) and TH-negative (TH<sup>-</sup>) neurons in the VTA.** (A, B) Spike waveforms for TH<sup>+</sup> and TH<sup>-</sup> neurons. (C) Average baseline firing rate. Mann-Whitney test,  $p=0.3457$ . (D) Average spike width. Mann-Whitney test,  $p=0.1446$ . (E) Average duration of the spike negative deflection. Mann-Whitney test,  $***p=0.0004$ . Data were collected from 23 TH<sup>+</sup> and 9 TH<sup>-</sup> neurons.
